# Supplementary material
Source: PubMed Central journal article supplement (PMC3396752)

# Supplemental Figure 1.

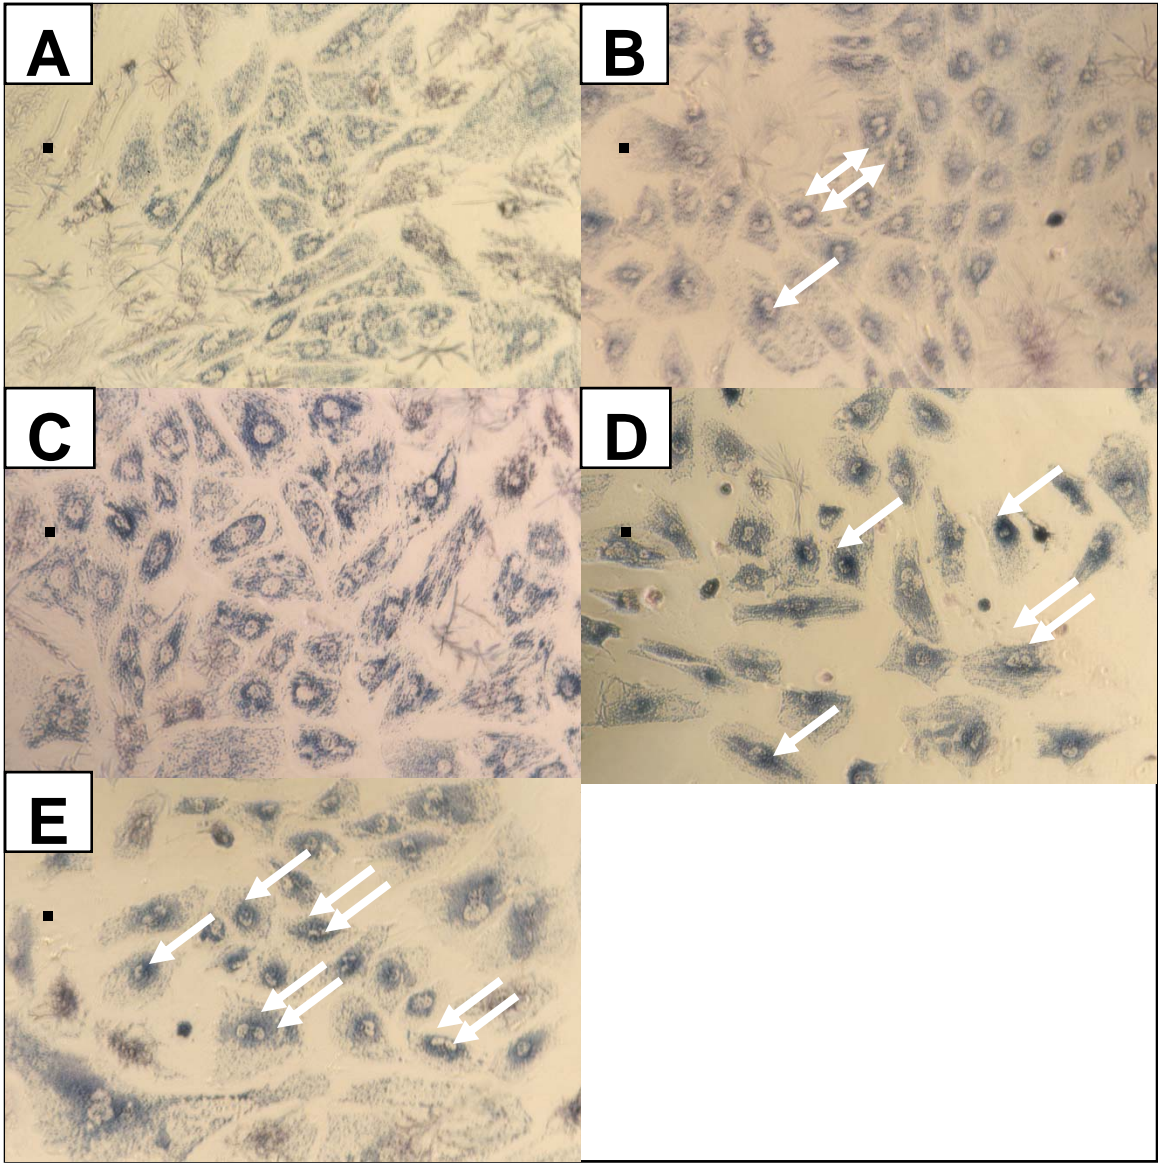

Supplement: NIHMS382624-supplement-01.pdf [file NIHMS382624-supplement-01.pdf]

# Supplemental Figure 2.

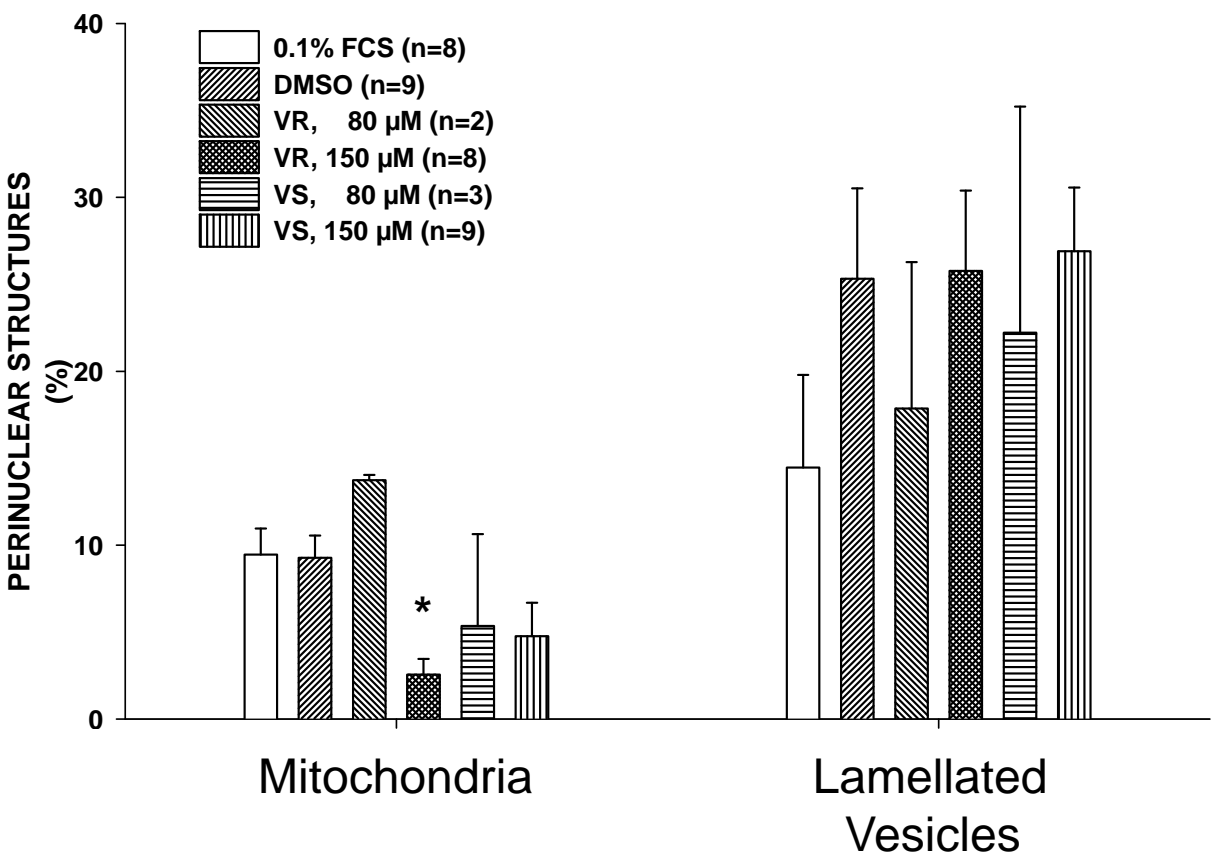

Supplement: NIHMS382624-supplement-02.pdf [file NIHMS382624-supplement-02.pdf]

# Supplemental Figure 3.

## A

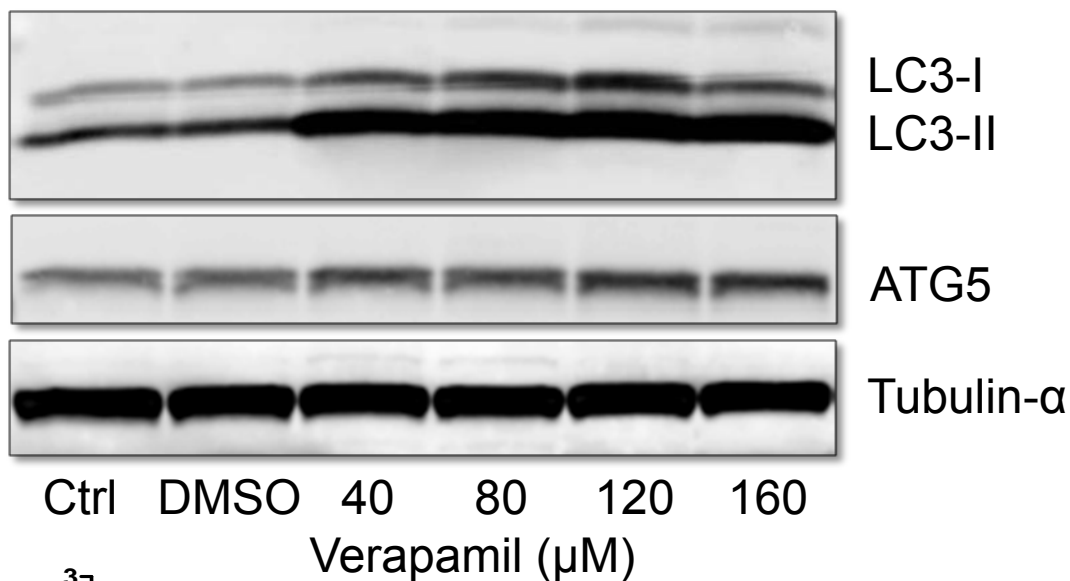

## B

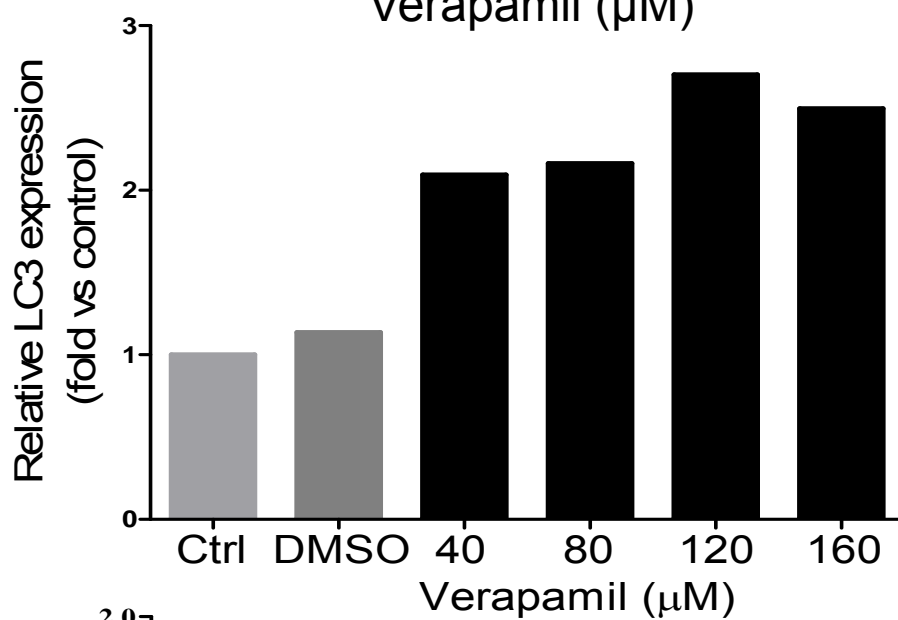

## C

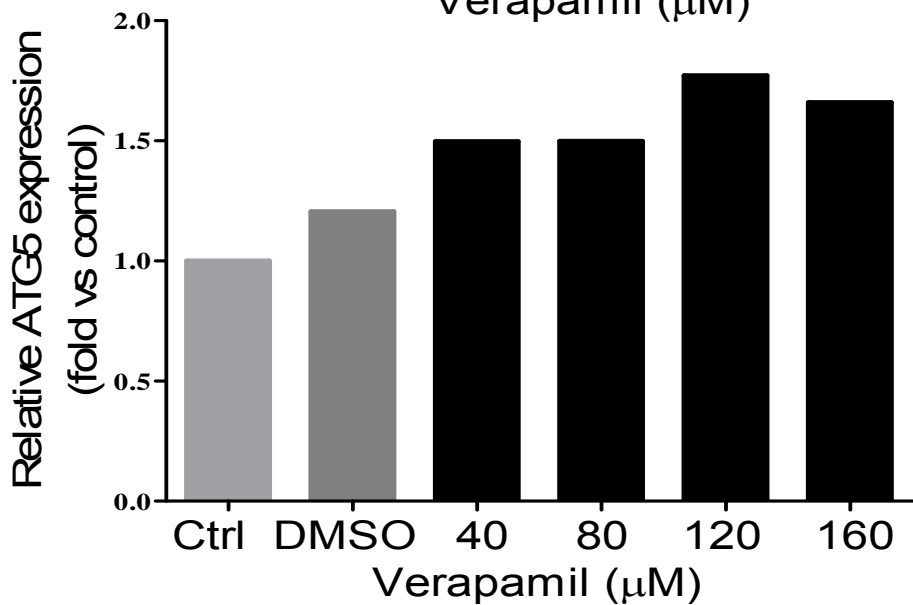

Supplement: NIHMS382624-supplement-03.pdf [file NIHMS382624-supplement-03.pdf]

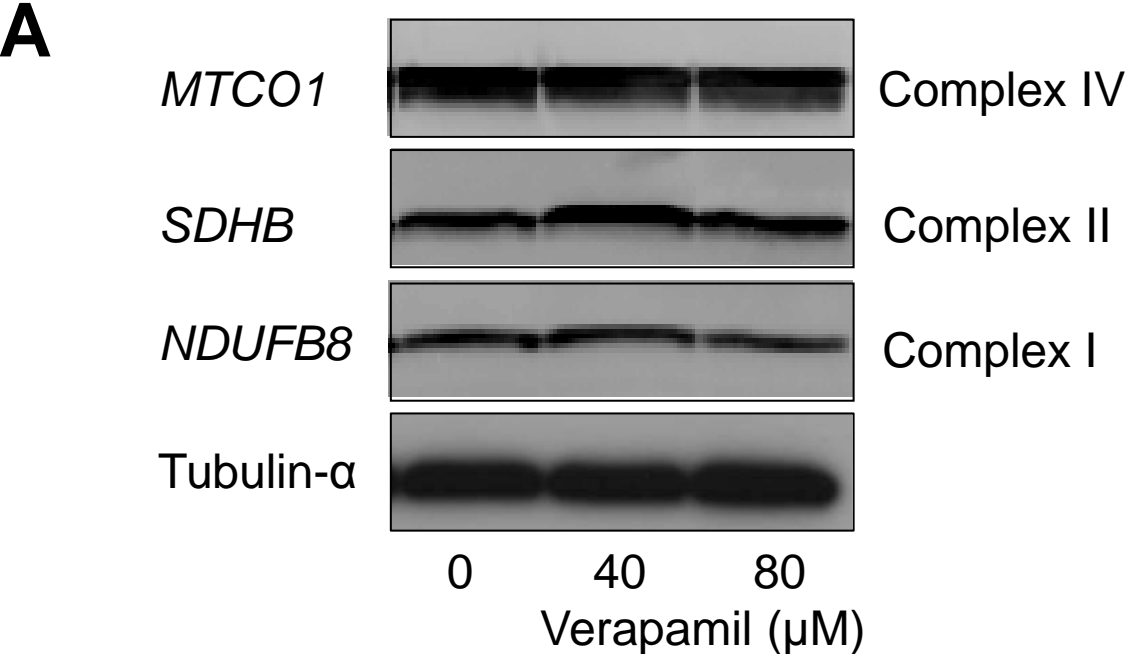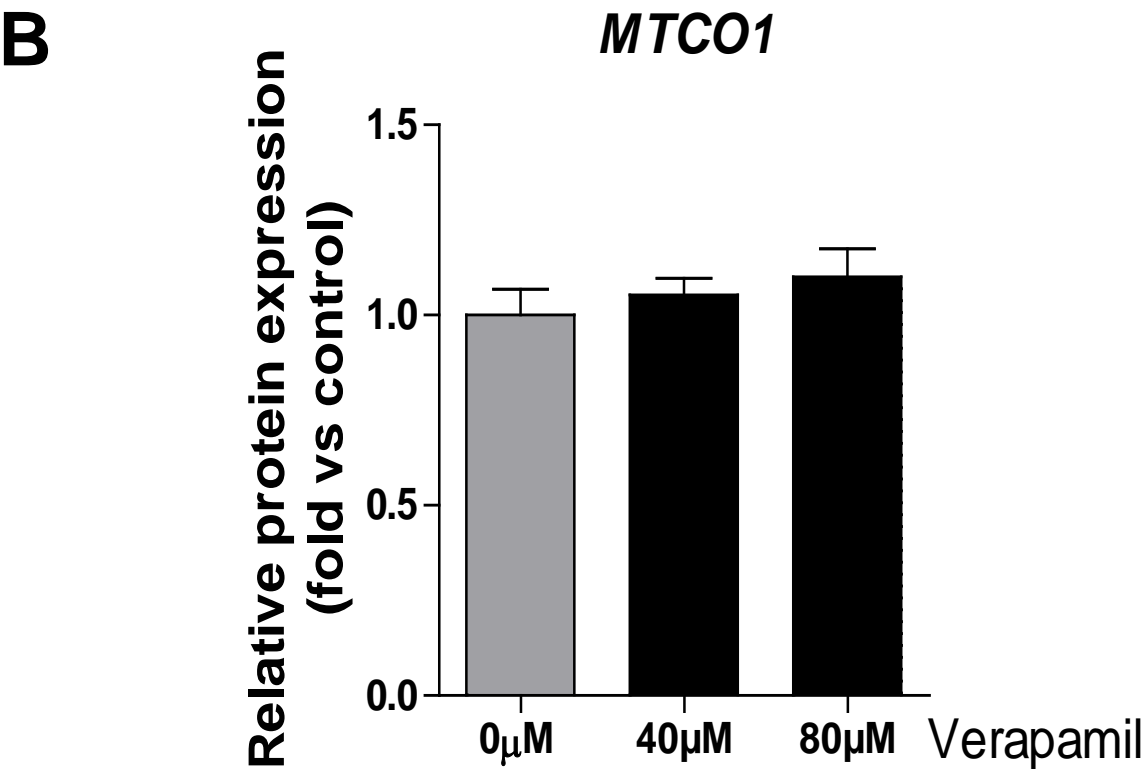

**C**

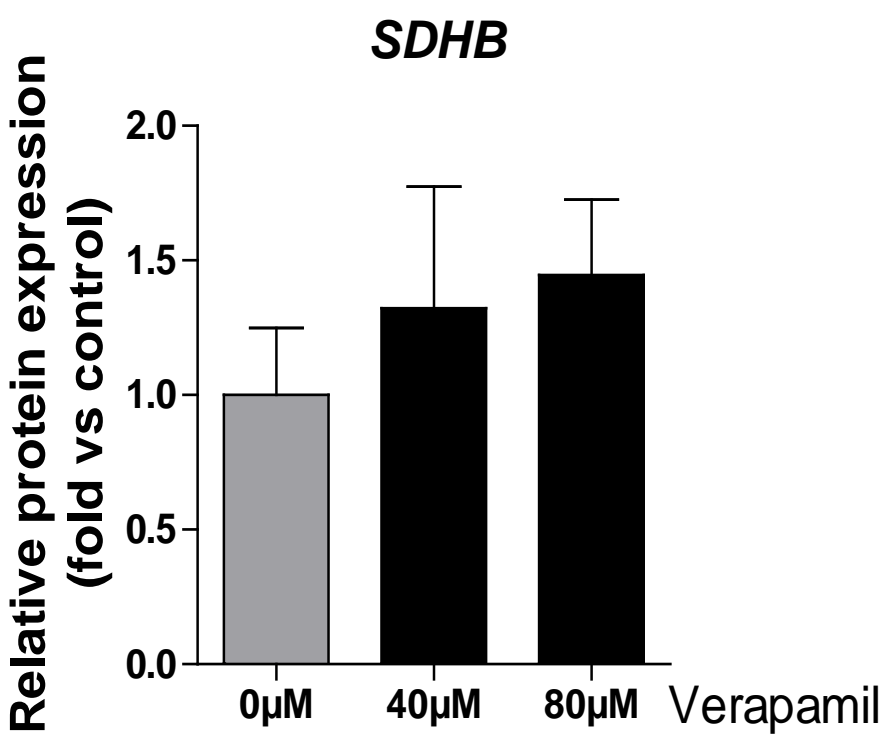

**D**

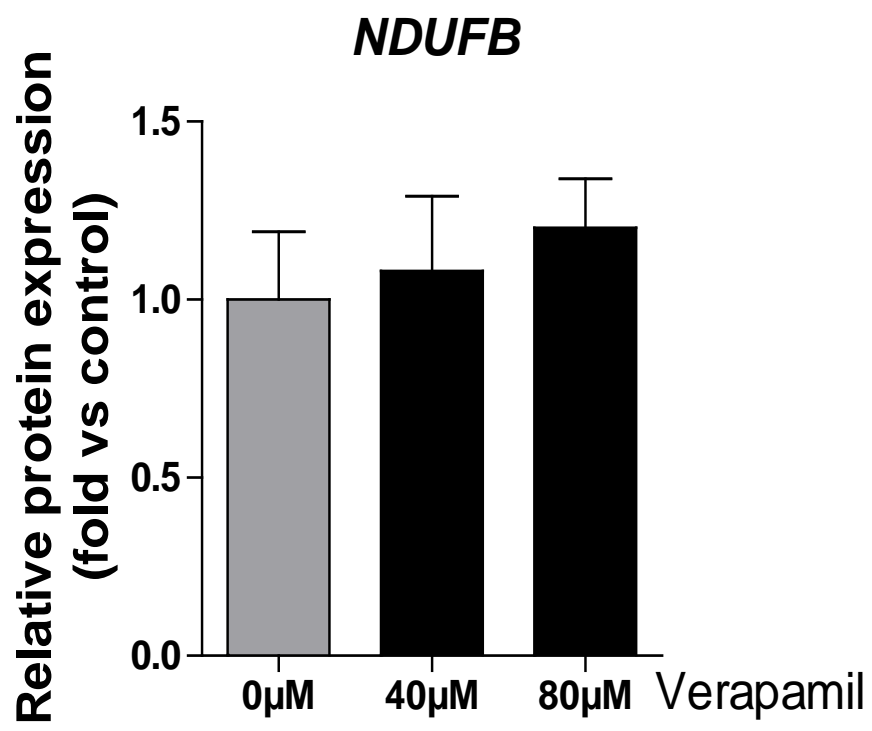

Supplement: NIHMS382624-supplement-04.pdf [file NIHMS382624-supplement-04.pdf]
